# Supplementary material
Source: PubMed Central journal article supplement (PMC7508259)

# Supplemental Material

Table S1. Ablation protocol and termination. AF: Atrial Fibrillation; NSR: Normal Sinus Rhythm.

| Patient # | Sources ablated | Termination | Termination at source | Ablation sequence |   |              |   |   |    |  |
|-----------|-----------------|-------------|-----------------------|-------------------|---|--------------|---|---|----|--|
|           |                 |             |                       | 0                 | 2 | 4            | 6 | 8 | 10 |  |
| # 1       | 3               | YES         | 2nd                   | AF                | * | NSR          |   |   |    |  |
| # 2       | 5               | NO          |                       | AF                |   |              |   |   |    |  |
| # 3       | 6               | NO          |                       | AF                |   |              |   |   |    |  |
| # 4       | 6               | NO          |                       | AF                |   |              |   |   |    |  |
| # 5       | 2               | NO          |                       | AF                |   |              |   |   |    |  |
| # 6       | 8               | YES         | 1st                   | AF                | * | NSR          |   |   |    |  |
| # 7       | 8               | NO          |                       | AF                |   |              |   |   |    |  |
| # 8       | 1               | NO          |                       | AF                |   |              |   |   |    |  |
| # 9       | 8               | YES         | 4th                   | AF                | * | NSR          |   |   |    |  |
| # 10      | 5               | YES         | 3rd                   | AF                | * | NSR          |   |   |    |  |
| # 11      | 6               | YES         | 2nd                   | AF                | * | NSR          |   |   |    |  |
| # 12      | 3               | YES         | 2nd                   | AF                | * | NSR          |   |   |    |  |
| # 13      | 5               | NO          |                       | AF                |   |              |   |   |    |  |
| # 14      | 9               | NO          |                       | AF                |   |              |   |   |    |  |
| # 15      | 2               | NO          |                       | AF                |   |              |   |   |    |  |
| # 16      | 7               | NO          |                       | AF                |   |              |   |   |    |  |
| # 17      | 2               | YES         | 2nd                   | AF                | * | ←Termination |   |   |    |  |

**Table S2. Cohort description: termination vs non-termination for the driver-guided ablation cohort.**

|                                       | <b>Patients with guided ablation</b> | <b>Termination</b> | <b>Non-termination</b> | <b>P value (Term. vs Non-term)</b> |
|---------------------------------------|--------------------------------------|--------------------|------------------------|------------------------------------|
| <b>N</b>                              | <b>17</b>                            | <b>7</b>           | <b>10</b>              |                                    |
| <b>Paroxysmal AF (%)</b>              | <b>3 (18%)</b>                       | <b>1 (14%)</b>     | <b>2 (20%)</b>         | <b>0.76</b>                        |
| <b>Male (%)</b>                       | <b>14 (82%)</b>                      | <b>5 (71%)</b>     | <b>9 (90%)</b>         | <b>0.32</b>                        |
| <b>Age (years)</b>                    | <b>67 ± 9</b>                        | <b>67 ± 12</b>     | <b>67 ± 8</b>          | <b>0.91</b>                        |
| <b>AF history (months)</b>            | <b>85 ± 70</b>                       | <b>88 ± 63</b>     | <b>84 ± 78</b>         | <b>0.90</b>                        |
| <b>Previous ablations</b>             | <b>0.6 ± 1.0</b>                     | <b>1.3 ± 1.2</b>   | <b>0.2 ± 0.4</b>       | <b>0.02</b>                        |
| <b>Total number of basket drivers</b> | <b>9.2 ± 4.0</b>                     | <b>8.6 ± 2.8</b>   | <b>9.6 ± 4.7</b>       | <b>0.61</b>                        |
| <b>Drivers ablated</b>                | <b>5.1 ± 2.5</b>                     | <b>5.0 ± 2.4</b>   | <b>5.1 ± 2.7</b>       | <b>0.93</b>                        |
| <b>Number of body surface drivers</b> | <b>8.2 ± 2.9</b>                     | <b>5.8 ± 3.1</b>   | <b>9.8 ± 4.5</b>       | <b>&lt; 0.0001</b>                 |

Figure S1. A. Intracardiac 3D map of patient #1 after ablation (red dots) of 3 driver sites. B. Simultaneous body surface map. C. Surface and intracardiac signals during AF termination to sinus rhythm.

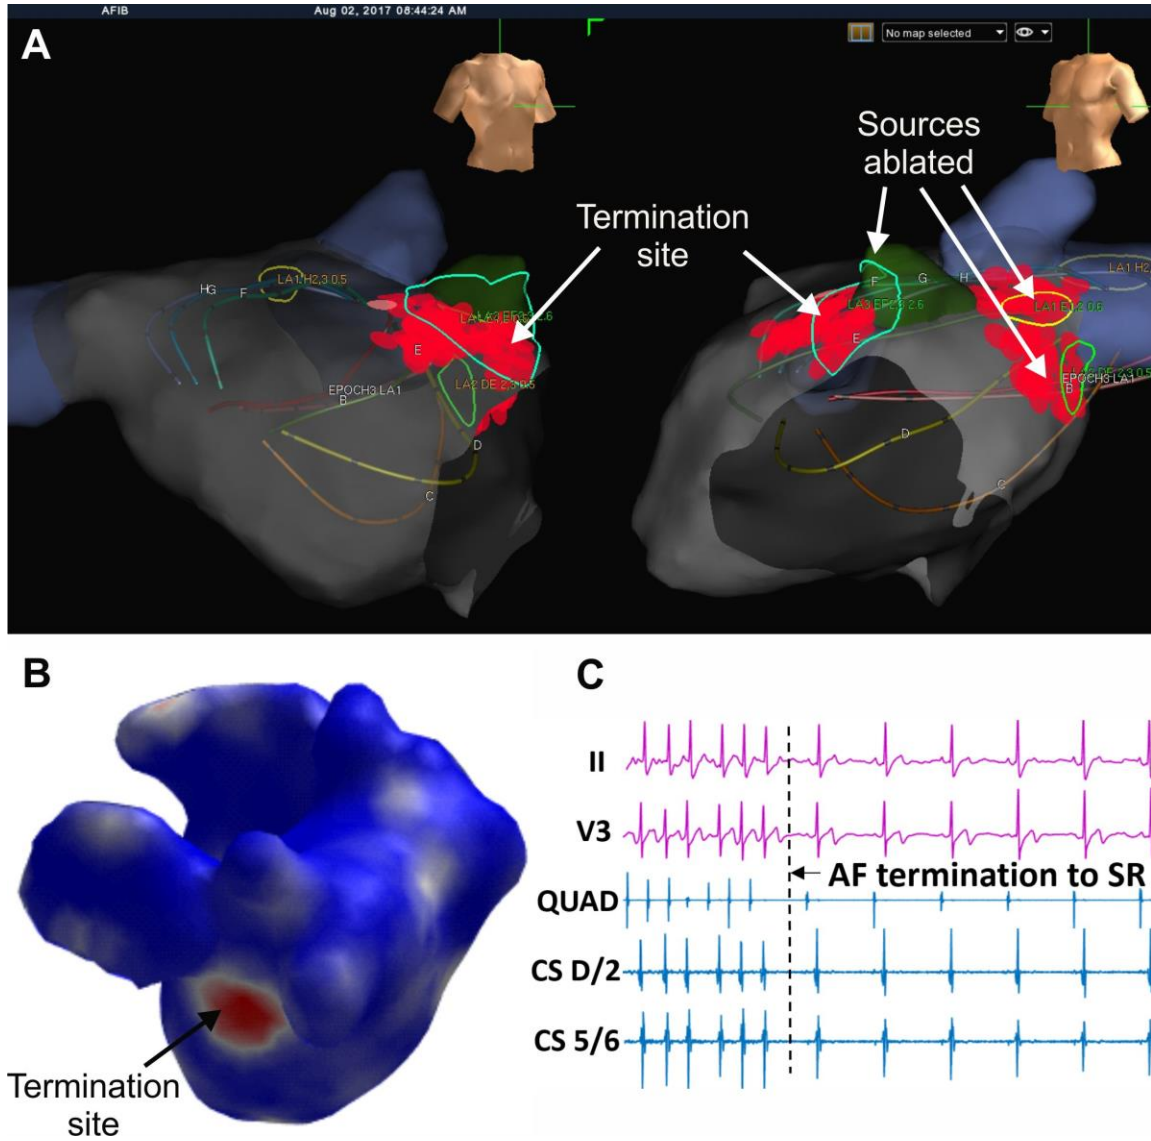

Figure S2. Number of reentrant sources in the Posterior Left Atrial Wall for Intracardiac (left) and body surface (right) analysis.

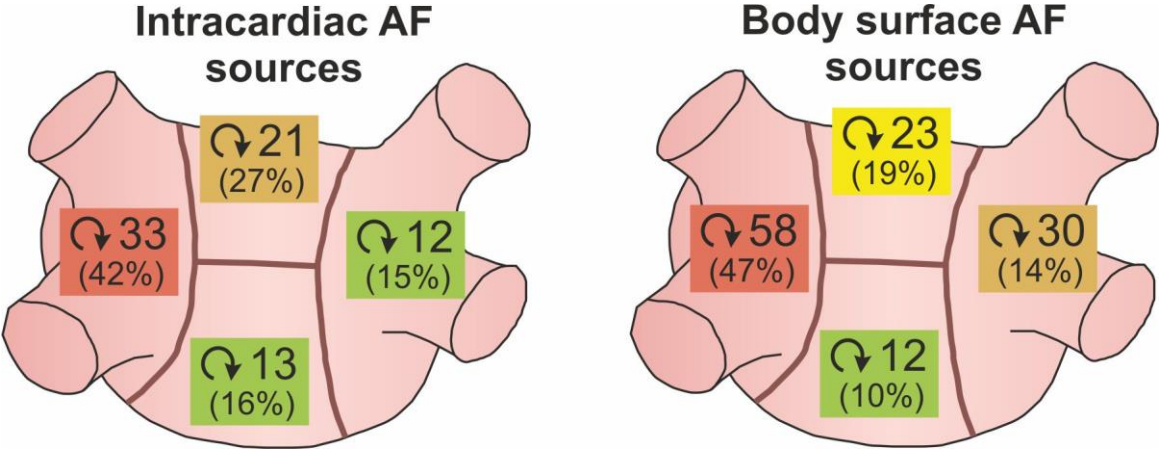

Figure S3. ROC curve when using the number of body surface drivers as predictor of acute termination.

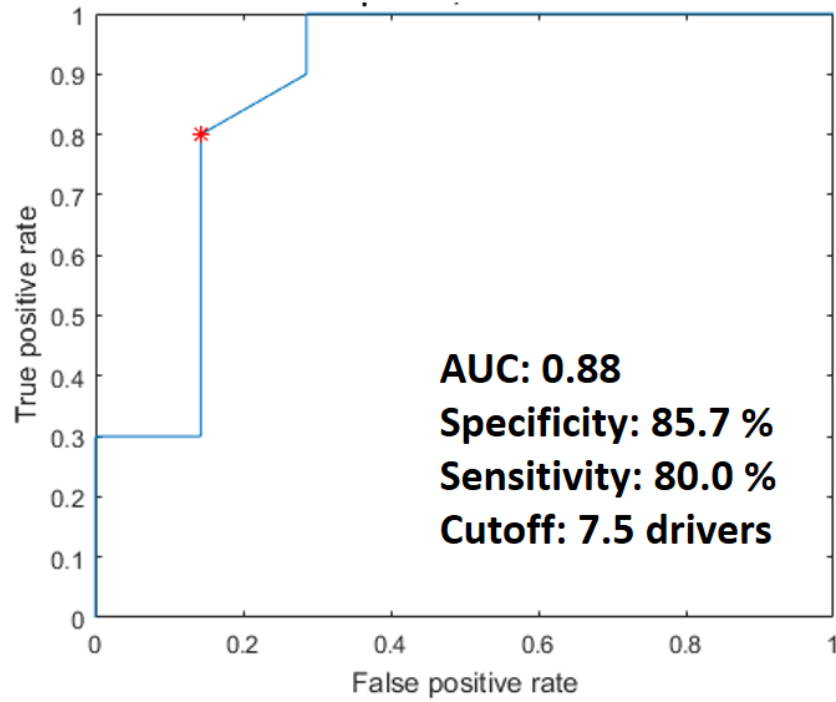

Figure S4. Coincidence between reentrant drivers identified by clinical system (Topera®) and the intracardiac phased-based method. A. Number of phase singularities. B. Percentage of total number of drivers. C. Percentage of time with detected drivers.

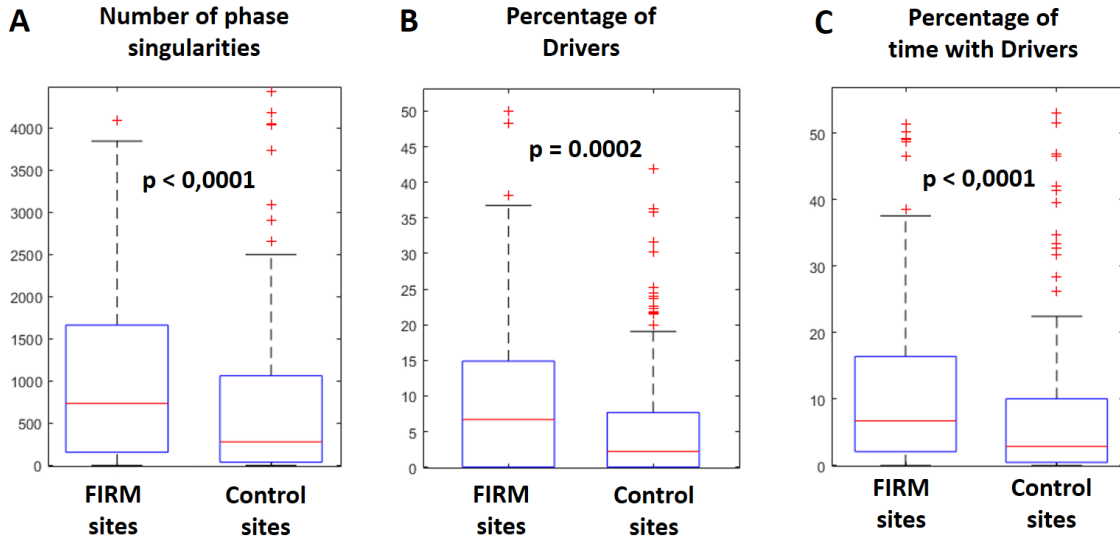

Supplement: NIHMS1561636-supplement-007700_-_Supplemental_Material.pdf [file NIHMS1561636-supplement-007700_-_Supplemental_Material.pdf]
